# Supplementary material for: Machine Learning-Based Radiomics of the Optic Chiasm Predict Visual Outcome Following Pituitary Adenoma Surgery
Source: MDPI journal article supplement (doi:10.3390/jpm11100991), 2021-09-30
Supplement: s1 [file s1]

**Supplementary Material 2:** Radiomic features selected using LASSO regression in five-fold cross-validation.

| Fold 1                                   | Fold 2                                   | Fold 3                                   | Fold 4                                   | Fold 5                                   |
|------------------------------------------|------------------------------------------|------------------------------------------|------------------------------------------|------------------------------------------|
| shape_SurfaceVolumeRatio                 | shape_SurfaceVolumeRatio                 | shape_SurfaceVolumeRatio                 | shape_SurfaceVolumeRatio                 | shape_SurfaceVolumeRatio                 |
| LLH_glcM_Idmn                            | LLH_glcM_Idmn                            | LLH_glcM_Idmn                            | LLH_glcM_Idmn                            | LLH_glcM_Idmn                            |
| LLH_gldm_LargeDependenceEmphasis         | LLH_gldm_LargeDependenceEmphasis         | LLH_gldm_LargeDependenceEmphasis         | LLH_gldm_LargeDependenceEmphasis         | LLH_gldm_LargeDependenceEmphasis         |
| LLH_glszm_SizeZoneNonUniformity          | LLH_glszm_SizeZoneNonUniformity          | LLH_glszm_SizeZoneNonUniformity          | LLH_glszm_SizeZoneNonUniformity          | LLH_glszm_SizeZoneNonUniformity          |
| LHL_glcM_Correlation                     | LHL_glcM_Correlation                     | LHL_glcM_Correlation                     | LHL_glcM_Correlation                     | LHL_glcM_Correlation                     |
| LHL_glszm_ZoneVariance                   | LHL_glszm_ZoneVariance                   | LHL_ngtdm_Busyness                       | LHH_glszm_GrayLevelNonUniformity         | LHL_glszm_ZoneVariance                   |
| LHL_ngtdm_Busyness                       | LHL_ngtdm_Busyness                       | LHH_glszm_GrayLevelNonUniformity         | HLL_glszm_LargeAreaHighGrayLevelEmphasis | LHH_glszm_GrayLevelNonUniformity         |
| LHH_glszm_GrayLevelNonUniformity         | LHH_glszm_GrayLevelNonUniformity         | HLL_glszm_LargeAreaHighGrayLevelEmphasis | HLL_glszm_ZoneVariance                   | HLL_glszm_LargeAreaHighGrayLevelEmphasis |
| HLL_glszm_LargeAreaHighGrayLevelEmphasis | HLL_glszm_LargeAreaHighGrayLevelEmphasis | HLL_glszm_ZoneVariance                   | HLH_ngtdm_Busyness                       | HLL_glszm_ZoneVariance                   |
| HLL_glszm_ZoneVariance                   | HLL_glszm_ZoneVariance                   | HLH_ngtdm_Busyness                       | HHL_glcM_ClusterShade                    | HLH_ngtdm_Busyness                       |
| HLH_ngtdm_Busyness                       | HLH_ngtdm_Busyness                       | HHL_glcM_ClusterShade                    | HHL_glcM_Imc1                            | HHL_glcM_ClusterShade                    |
| HHL_glcM_ClusterShade                    | HHL_glcM_ClusterShade                    | HHL_glcM_Imc1                            | HHH_firstorder_Median                    | HHL_glcM_Imc1                            |
| HHL_glcM_Imc1                            | HHL_glcM_Imc1                            | HHH_firstorder_Median                    | HHH_glcM_InverseVariance                 | HHH_firstorder_Median                    |
| HHH_firstorder_Median                    | HHH_firstorder_Median                    | HHH_glcM_InverseVariance                 | HHH_gldm_DependenceVariance              | HHH_glcM_InverseVariance                 |
| HHH_glcM_InverseVariance                 | HHH_glcM_InverseVariance                 | HHH_gldm_DependenceVariance              | LLL_firstorder_Skewness                  | HHH_gldm_DependenceVariance              |
| HHH_gldm_DependenceVariance              | LLL_firstorder_Skewness                  | LLL_firstorder_Skewness                  | LLL_glcM_Idn                             | LLL_firstorder_Skewness                  |
| LLL_firstorder_Skewness                  | LLL_glcM_Idn                             | LLL_glcM_Idn                             |                                          | LLL_glcM_Idn                             |
| LLL_glcM_Idn                             |                                          |                                          |                                          |                                          |
