# Supplementary material for: Machine Learning-Based Radiomics of the Optic Chiasm Predict Visual Outcome Following Pituitary Adenoma Surgery
Source: MDPI journal article supplement (doi:10.3390/jpm11100991), 2021-09-30
Supplement: s1 [file s1]

**Supplementary Material 1:** The calculation formula of the performance metrics.

The accuracy is calculated with the following equation:

$$\text{Accuracy} = \frac{\text{TP} + \text{TN}}{\text{TP} + \text{TN} + \text{FP} + \text{FN}},$$

where TP is the true positives, TN the true negatives, FP the false positives, and FN the false negatives.

The sensitivity is calculated with the following equation:

$$\text{Sensitivity} = \frac{\text{TP}}{\text{TP} + \text{FN}}$$

The specificity is calculated with the following equation:

$$\text{Specificity} = \frac{\text{TN}}{\text{TN} + \text{FP}}$$

The positive predict value (PPV) is calculated with the following equation:

$$\text{PPV} = \frac{\text{TP}}{\text{TP} + \text{FP}}$$

The negative predict value (NPV) is calculated with the following equation:

$$\text{NPV} = \frac{\text{TN}}{\text{TN} + \text{FN}}$$
